# Supplementary material
Source: Springer Nature journal article supplement (https://www.springermedizin.de/resource/supplementary/12905_2010_225_MOESM2_ESM.pdf/9518236)
Supplement: MOESM2 [file 9518236]

**Category**

*Sub-categories*

**Justified as part of male prestige**  
Men having different blood      Influenced by the power of money

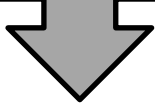

**Category**

*Sub-categories*

**Viewed as discreditable and unfair**  
A shame to admit      A threat to human dignity

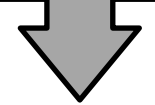

**Category**

*Sub-categories*

**Results in emotional entrapment**  
Self-blame      Shifting tolerance

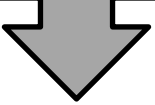

**Category**

*Sub-categories*

**Fed up with passivity**  
A wish for change      Gender norms in transition

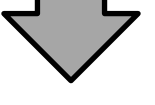

**Core Category**

**Moving from frustration to questioning traditional gender norms**
